# Supplementary material for: Signals from the brood modulate the sleep of brood tending bumblebee workers
Source: bioRxiv or medRxiv preprint supplement (doi:10.1101/500744), 2018-12-18
Supplement: Supplementary file [file media-4.pdf]

**Movie 1: A bumblebee worker performing Incubation-like behavior.** The bee lays on-top of the pupa with her abdomen 'extended' over it, showing frequent pumping movements; her legs are wrapped around the pupa. The antennae are raised with an angle of  $> 90^\circ$  between frons and scape, constantly moving without touching the substrate.

**Movie 2: A bumblebee worker performing sleep-like behavior.** The bee stops walking, gradually her antennae relax showing only low frequency movements, their angle falls below  $90^\circ$  between frons and scape. The ventilation pumping of the abdomen are discontinuous.
